# Supplementary material
Source: PubMed Central journal article supplement (PMC4407754)
Supplement: supp_dc14-2311v142311_DC142311SupplementaryData.pdf [file supp_dc14-2311v142311_DC142311SupplementaryData.pdf]

## SUPPLEMENTARY DATA

Study Site Information:

### Contributors

- **Manchester:** Hassan Fadavi, Uazman Alam, Omar Asghar, Patrick Green, Georgios Ponirakis, Andrew J Marshall
- **Brisbane:** Katie Edwards, Cirous Dehghani, Anthony W Russell
- **Utah:** Gene Kim, Krista Kinard, Margaret Lessard, Mark Mifflin
- **Calgary:** Jean K Mah, William F Astle, Linda L Cooper, Claire Gougeon, Heidi Virtanen, Christine Millar, Charlene Gillis, Heather Sandusky
- **Düsseldorf:** Nikolaos Papanas<sup>1</sup>, Iris Ziegler<sup>1</sup>, Alexander Strom<sup>1</sup>, Stephan Allgeier<sup>3</sup>, Karsten Winter<sup>4</sup>, Sabine Peschel<sup>5</sup>, Bernd Köhler<sup>6</sup>, Oliver Stachs<sup>5</sup>, Michael Roden<sup>1,2</sup>, Rudolf F. Guthoff<sup>5</sup>

<sup>1</sup>Institute for Clinical Diabetology, German Diabetes Center at Heinrich Heine University, Düsseldorf, Germany

<sup>2</sup>Department of Endocrinology and Diabetology, University Hospital, Düsseldorf, Germany

<sup>3</sup>Institute for Applied Computer Science and Automation, Karlsruhe Institute of Technology, Karlsruhe, Germany

<sup>4</sup>Translational Centre for Regenerative Medicine, University of Leipzig, Leipzig, Germany.

<sup>5</sup>Department of Ophthalmology, University of Rostock, Rostock, Germany

<sup>6</sup>Institute for Applied Computer Science, Karlsruhe Institute of Technology, Karlsruhe, Germany
